# Supplementary material for: The ancestral levels of transcription and the evolution of sexual phenotypes in filamentous fungi
Source: PubMed Central journal article supplement (PMC5509106; doi:10.1371/journal.pgen.1006867), 2017-07-13
Supplement: pgen.1006867.s004.pdf [file pgen.1006867.s004.pdf]

|           | (PH1 on left)                                                                                                                                           |
|-----------|---------------------------------------------------------------------------------------------------------------------------------------------------------|
| PH-1      | N/A                                                                                                                                                     |
| FGSG_0565 | 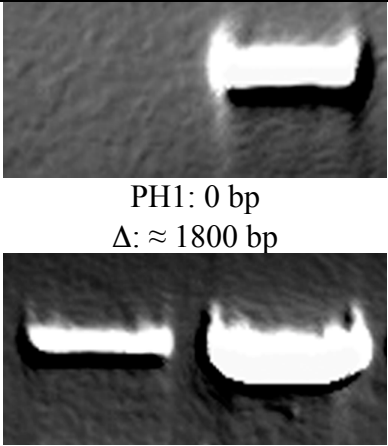 <p>PH1: 0 bp<br/>Δ: ≈ 1800 bp</p> <p>PH1: 3686 bp<br/>Δ: 3656 bp</p>  |
| FGSG_1108 |  <p>PH1: 0 bp<br/>Δ: ≈ 1800 bp</p> <p>PH1: 4159 bp<br/>Δ: 3600 bp</p> |

**Figure S4. PCR verification of knockouts of *Fusarium graminearum*.** Top image is of the internal check (*hyg* gene); Bottom image is the external check (primers from **Table S7**).

|                  |                                                                                                                                                                                                                  |
|------------------|------------------------------------------------------------------------------------------------------------------------------------------------------------------------------------------------------------------|
| <p>FGSG_2102</p> | 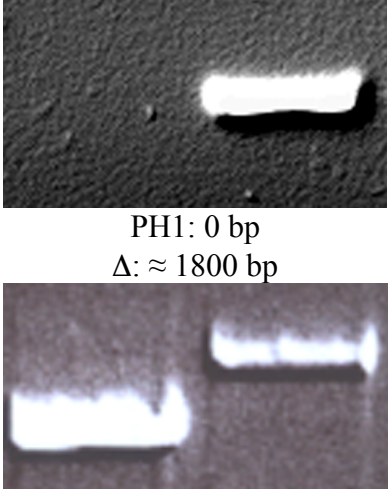 <p>PH1: 0 bp<br/> <math>\Delta</math>: <math>\approx</math> 1800 bp</p> <p>PH1: 2480 bp<br/> <math>\Delta</math>: 3630 bp</p>  |
| <p>FGSG_3028</p> |  <p>PH1: 0 bp<br/> <math>\Delta</math>: <math>\approx</math> 1800 bp</p> <p>PH1: 2575 bp<br/> <math>\Delta</math>: 3882 bp</p> |
| <p>FGSG_4001</p> |  <p>PH1: 0 bp<br/> <math>\Delta</math>: <math>\approx</math> 1800 bp</p>                                                      |

|           |                                                                                                                                                                                                                                                                                                      |
|-----------|------------------------------------------------------------------------------------------------------------------------------------------------------------------------------------------------------------------------------------------------------------------------------------------------------|
|           |  <p>PH1: 2718 bp<br/> <math>\Delta</math>: 2752 bp</p>                                                                                                                                                              |
| FGSG_4417 |  <p>PH1: 0 bp<br/> <math>\Delta</math>: <math>\approx</math> 1800 bp</p>  <p>PH1: 0 bp<br/> <math>\Delta</math>: 2100 bp</p>       |
| FGSG_4997 |  <p>PH1: 0 bp<br/> <math>\Delta</math>: <math>\approx</math> 1800 bp</p>  <p>PH1: 3651 bp<br/> <math>\Delta</math>: 3599 bp</p> |
| FGSG_5166 |  <p>PH1: 0 bp<br/> <math>\Delta</math>: <math>\approx</math> 1800 bp</p>                                                                                                                                          |

|           |                                                                                                                                                                                                                   |
|-----------|-------------------------------------------------------------------------------------------------------------------------------------------------------------------------------------------------------------------|
|           | 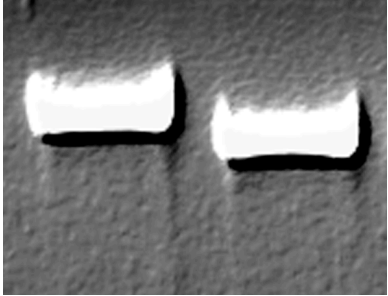 <p>PH1: 3959 bp<br/> <math>\Delta</math>: 3525 bp</p>                                                                           |
| FGSG_5652 |  <p>PH1: 0 bp<br/> <math>\Delta</math>: <math>\approx</math> 1800 bp</p> <p>PH1: 4044 bp<br/> <math>\Delta</math>: 3606 bp</p>   |
| FGSG_6651 |  <p>PH1: 0 bp<br/> <math>\Delta</math>: <math>\approx</math> 1800 bp</p> <p>PH1: 3774 bp<br/> <math>\Delta</math>: 3930 bp</p> |
| FGSG_7111 |  <p>PH1: 0 bp<br/> <math>\Delta</math>: <math>\approx</math> 1800 bp</p>                                                       |

|           |                                                                                                                                                                                                                   |
|-----------|-------------------------------------------------------------------------------------------------------------------------------------------------------------------------------------------------------------------|
|           |  <p>PH1: 0 bp<br/> <math>\Delta</math>: <math>\approx</math> 1800 bp</p>                                                         |
| FGSG_7478 |  <p>PH1: 0 bp<br/> <math>\Delta</math>: <math>\approx</math> 1800 bp</p> <p>PH1: 2430 bp<br/> <math>\Delta</math>: 3771 bp</p>  |
| FGSG_8695 |  <p>PH1: 0 bp<br/> <math>\Delta</math>: <math>\approx</math> 1800 bp</p> <p>PH1: 2512 bp<br/> <math>\Delta</math>: 3552 bp</p> |

|                   |                                                                                                                                                                                                                  |
|-------------------|------------------------------------------------------------------------------------------------------------------------------------------------------------------------------------------------------------------|
| <p>FGSG_10094</p> | 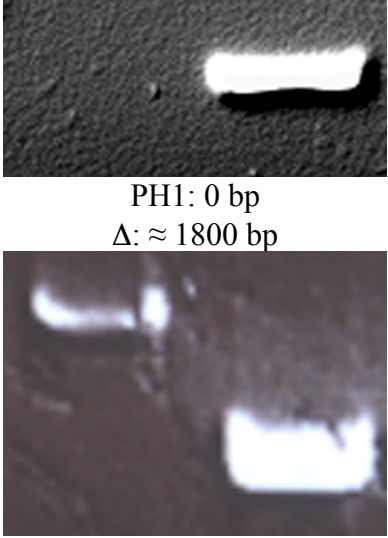 <p>PH1: 0 bp<br/> <math>\Delta</math>: <math>\approx</math> 1800 bp</p> <p>PH1: 6899 bp<br/> <math>\Delta</math>: 3612 bp</p>  |
| <p>FGSG_13162</p> |  <p>PH1: 0 bp<br/> <math>\Delta</math>: <math>\approx</math> 1800 bp</p> <p>PH1: 7567 bp<br/> <math>\Delta</math>: 3414 bp</p> |
| <p>FGSG_16340</p> |  <p>PH1: 0 bp<br/> <math>\Delta</math>: <math>\approx</math> 1800 bp</p>                                                      |

|            |                                                                                                                                                                                                                                          |
|------------|------------------------------------------------------------------------------------------------------------------------------------------------------------------------------------------------------------------------------------------|
|            | 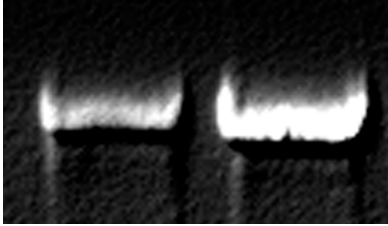 <p>PH1: 3842 bp<br/> <math>\Delta</math>: 3777 bp</p>                                                                                                  |
| FGSG_16849 | <p>Photo Not Available<br/> PH1: 0 bp<br/> <math>\Delta</math>: <math>\approx</math> 1800 bp</p>  <p>PH1: 3537 bp<br/> <math>\Delta</math>: 3738 bp</p> |
| FGSG_17494 | <p>No Internal Check Completed</p>  <p>PH1: 7758 bp<br/> <math>\Delta</math>: 3941 bp</p>                                                             |
| FGSG_17499 |  <p>PH1: 0 bp<br/> <math>\Delta</math>: <math>\approx</math> 1900 bp</p>                                                                              |

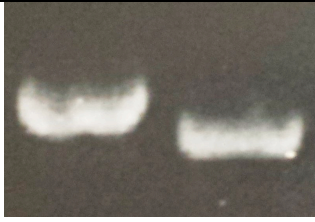

Δ: 3583 bp  
PH1: 3160 bp
